# Supplementary material for: An electrochemical detection of cadmium (II) and lead (II) ions using a polymer-modified electrode with a Schiff base by square wave voltammetry
Source: Research Square preprint supplement (doi:10.21203/rs.3.rs-240222/v1), 2021-02-25
Supplement: Supplementary file 1 [file 09b38df549102f13470e668f.docx]

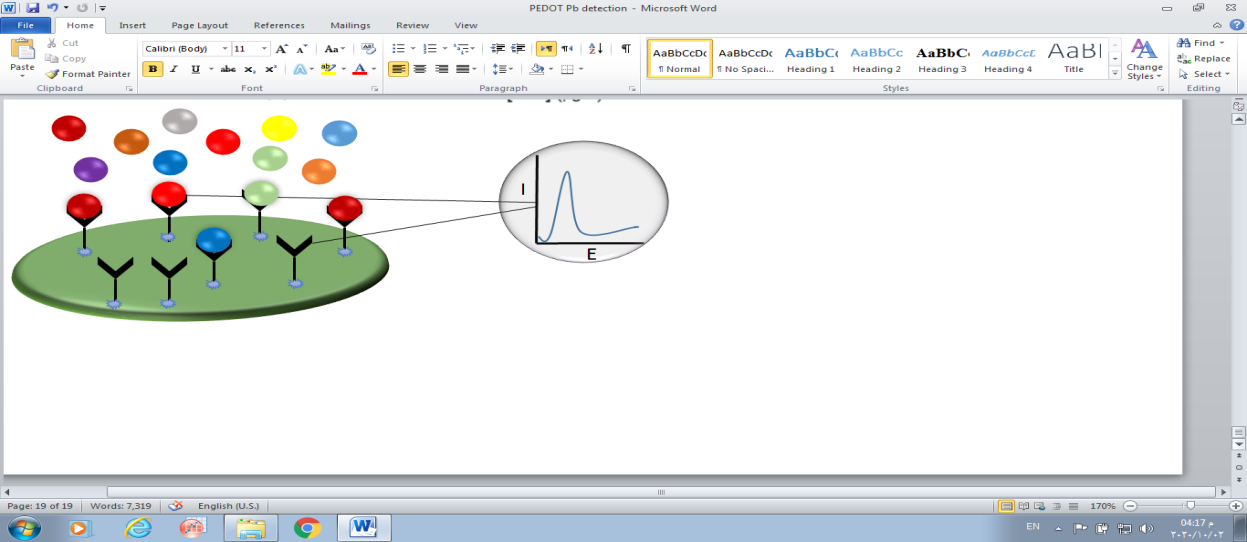

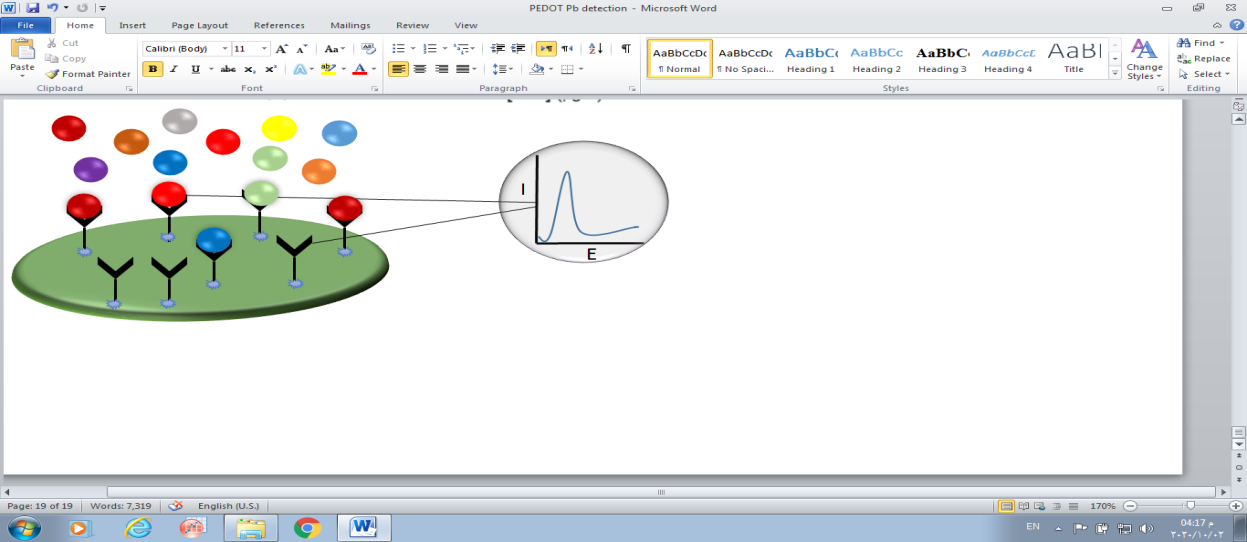


**Metal ions**

**Reactive sites**

**Receptor/ ligand**

**Poly EDOT/ Schiff electrode**

**Square wave voltammetry**

**Computer processing**
